# Supplementary material for: Effects of dietary organic acids and nature identical compounds on growth, immune parameters and gut microbiota of European sea bass
Source: PubMed Central journal article supplement (PMC7721706; doi:10.1038/s41598-020-78441-9), 2020-12-07
Supplement: 41598_2020_78441_MOESM1_ESM.pdf [file 41598_2020_78441_MOESM1_ESM.pdf]

**Effects of dietary organic acids and nature identical compounds on growth, immune parameters and gut microbiota of European sea bass**

Serena Busti<sup>1</sup>, Barbara Rossi<sup>2</sup>, Enrico Volpe<sup>1</sup>, Sara Ciulli<sup>1</sup>, Andrea Piva<sup>1,2</sup>, Federica D'Amico<sup>3</sup>, Matteo Soverini<sup>3</sup>, Marco Candela<sup>3</sup>, Pier Paolo Gatta<sup>1</sup>, Alessio Bonaldo<sup>1\*</sup>, Ester Grilli<sup>1</sup>, Luca Parma<sup>1</sup>

<sup>1</sup>Department of Veterinary Medical Sciences, University of Bologna, Via Tolara di Sopra 50, 40064 Ozzano Emilia, Bologna, Italy;

<sup>2</sup>Vetagro S.p.A., Via Porro 2, 42124, Reggio Emilia, Italy;

<sup>3</sup>Unit of Microbial Ecology of Health, Department of Pharmacy and Biotechnology, University of Bologna, Via Belmeloro 6, 40126 Bologna, Italy

\*Corresponding author: [alessio.bonaldo@unibo.it](mailto:alessio.bonaldo@unibo.it)

## SUPPLEMENTARY INFORMATION

**Supplementary Table S1.** Mean relative abundance (%)  $\pm$  SD (n=3) of bacterial phyla and genera detected in the hindgut content of European sea bass fed different diets at 71 days (pre-suboptimal rearing condition), and at 81 days (post-suboptimal rearing condition). D0= 0 mg Kg<sup>-1</sup> organic acids and nature-identical compounds (OA, NIC) ; D250 = 250 mg Kg<sup>-1</sup>OA, NIC; D500 = 500 mg Kg<sup>-1</sup> OA, NIC; D1000 = 1000 mg Kg<sup>-1</sup> OA, NIC. Only taxa with relative abundance >0.05% in at least 1 samples were included. Taxa which represent <0.05% abundance were grouped “Other”.

| Diet                    | Pre- suboptimal rearing condition |     |             |      |             |     |             |     | Post-suboptimal rearing condition |             |       |             |     |
|-------------------------|-----------------------------------|-----|-------------|------|-------------|-----|-------------|-----|-----------------------------------|-------------|-------|-------------|-----|
|                         | D0                                |     | D250        |      | D500        |     | D1000       |     | D0                                |             | D1000 |             |     |
| Phylum                  | Mean                              | SD  | Mean        | SD   | Mean        | SD  | Mean        | SD  | Mean                              | SD          | Mean  | SD          |     |
| <i>Firmicutes</i>       | <b>69.4</b>                       | 3.6 | <b>78</b>   | 10.8 | <b>78.4</b> | 3.9 | <b>77.7</b> | 4.5 | <i>Firmicutes</i>                 | <b>54.6</b> | 3.2   | <b>54.2</b> | 1.4 |
| <i>Actinobacteria</i>   | <b>12.3</b>                       | 1.9 | <b>9.1</b>  | 1.6  | <b>10.8</b> | 0.5 | <b>10.5</b> | 1.3 | <i>Proteobacteria</i>             | <b>13.5</b> | 3.8   | <b>18.4</b> | 0.8 |
| <i>Cyanobacteria</i>    | <b>12.2</b>                       | 2.8 | <b>7.3</b>  | 8.2  | <b>6.3</b>  | 4.6 | <b>3.4</b>  | 1.2 | <i>Fusobacteria</i>               | <b>7.7</b>  | 6.0   | <b>9.9</b>  | 2.2 |
| <i>Proteobacteria</i>   | <b>5</b>                          | 0.8 | <b>4.7</b>  | 1.7  | <b>3.5</b>  | 1.4 | <b>6</b>    | 4.0 | <i>Bacteroidetes</i>              | <b>13</b>   | 3.7   | <b>8.3</b>  | 1.3 |
| <i>Acidobacteria</i>    | <b>0.4</b>                        | 0.2 | <b>0.2</b>  | 0.2  | <b>0.3</b>  | 0.3 | <b>0.8</b>  | 1.1 | <i>Actinobacteria</i>             | <b>6.5</b>  | 1.5   | <b>5.6</b>  | 0.3 |
| <i>Bacteroidetes</i>    | <b>0.4</b>                        | 0.2 | <b>0.4</b>  | 0.3  | <b>0.3</b>  | 0.1 | <b>0.4</b>  | 0.3 | <i>Cyanobacteria</i>              | <b>0.3</b>  | 0.2   | <b>0.9</b>  | 0.8 |
| <i>Chloroflexi</i>      | <b>0</b>                          | 0.0 | <b>0</b>    | 0.0  | <b>0</b>    | 0.0 | <b>0.4</b>  | 0.6 | <i>Verrucomicrobia</i>            | <b>2.4</b>  | 1.2   | <b>0.6</b>  | 0.5 |
| <i>TM7</i>              | <b>0.1</b>                        | 0.1 | <b>0.1</b>  | 0.1  | <b>0.2</b>  | 0.1 | <b>0.3</b>  | 0.3 | <i>Chlamydiae</i>                 | <b>0.1</b>  | 0.1   | <b>0.3</b>  | 0.3 |
| <i>Planctomycetes</i>   | <b>0</b>                          | 0.0 | <b>0</b>    | 0.0  | <b>0</b>    | 0.0 | <b>0.1</b>  | 0.2 | <i>Acidobacteria</i>              | <b>0.1</b>  | 0.1   | <b>0.2</b>  | 0.1 |
| <i>WPS-2</i>            | <b>0</b>                          | 0.0 | <b>0</b>    | 0.0  | <b>0</b>    | 0.0 | <b>0.1</b>  | 0.2 | <i>Chloroflexi</i>                | <b>0.1</b>  | 0.2   | <b>0.1</b>  | 0.2 |
| <i>Verrucomicrobia</i>  | <b>0.1</b>                        | 0.0 | <b>0</b>    | 0.0  | <b>0</b>    | 0.0 | <b>0.1</b>  | 0.1 | <i>Planctomycetes</i>             | <b>0.1</b>  | 0.1   | <b>0.1</b>  | 0.1 |
| <i>Other</i>            | <b>0.1</b>                        | 0.1 | <b>0.1</b>  | 0.0  | <b>0.1</b>  | 0.0 | <b>0.2</b>  | 0.2 | <i>Other</i>                      | <b>1.3</b>  | 1.2   | <b>1.2</b>  | 1.3 |
| Diet                    | D0                                |     | D250        |      | D500        |     | D1000       |     | D0                                |             | D1000 |             |     |
| Genus                   | Mean                              | SD  | Mean        | SD   | Mean        | SD  | Mean        | SD  | Mean                              | SD          | Mean  | SD          |     |
| <i>Lactobacillus</i>    | <b>25.2</b>                       | 0.8 | <b>23.1</b> | 3.4  | <b>27.6</b> | 1.5 | <b>23.2</b> | 4.6 | <i>Enterobacteriaceae</i>         | <b>8.3</b>  | 5.4   | <b>11.5</b> | 2.0 |
| <i>Leuconostocaceae</i> | <b>12.4</b>                       | 3.2 | <b>21.3</b> | 4.2  | <b>17.7</b> | 0.9 | <b>14.5</b> | 7.0 | <i>Eubacterium</i>                | <b>7.9</b>  | 5.9   | <b>10.5</b> | 3.3 |
| <i>Streptococcus</i>    | <b>16.3</b>                       | 3.9 | <b>16.1</b> | 3.1  | <b>14.7</b> | 4.0 | <b>13.2</b> | 7.0 | <i>Cetobacterium</i>              | <b>7.7</b>  | 5.9   | <b>9.8</b>  | 2.2 |
| <i>Streptophyta</i>     | <b>12.2</b>                       | 2.8 | <b>7.3</b>  | 8.2  | <b>6.3</b>  | 4.6 | <b>3.2</b>  | 1.6 | <i>Bacillus</i>                   | <b>3.7</b>  | 2.5   | <b>5.5</b>  | 1.7 |
| <i>Bacillus</i>         | <b>3.0</b>                        | 2.4 | <b>3.4</b>  | 1.9  | <b>4.4</b>  | 3.2 | <b>7.4</b>  | 6.8 | <i>Clostridium</i>                | <b>3.4</b>  | 1.2   | <b>4.4</b>  | 0.2 |
| <i>Corynebacterium</i>  | <b>8.8</b>                        | 1.2 | <b>5.6</b>  | 1.2  | <b>7.2</b>  | 0.5 | <b>6.6</b>  | 0.8 | <i>Erysipelotrichaceae</i>        | <b>3.0</b>  | 1.7   | <b>4.2</b>  | 0.9 |

|                                |            |     |            |     |            |     |            |     |                              |            |     |            |     |
|--------------------------------|------------|-----|------------|-----|------------|-----|------------|-----|------------------------------|------------|-----|------------|-----|
| <i>Leuconostoc</i>             | <b>4.5</b> | 0.3 | <b>5.3</b> | 0.6 | <b>4.9</b> | 1.2 | <b>4.6</b> | 2.6 | <i>Bacteroidaceae</i>        | <b>3.1</b> | 2.6 | <b>3.8</b> | 1.3 |
| <i>Bacillaceae</i>             | <b>1.3</b> | 0.6 | <b>1.8</b> | 1.0 | <b>1.9</b> | 0.8 | <b>3.7</b> | 3.5 | <i>Coriobacteriaceae</i>     | <b>3.0</b> | 1.7 | <b>3.8</b> | 0.6 |
| <i>Geobacillus</i>             | <b>0.6</b> | 0.5 | <b>0.9</b> | 0.4 | <b>1.2</b> | 0.6 | <b>2.1</b> | 2.4 | <i>Lachnospiraceae</i>       | <b>3.8</b> | 0.1 | <b>3.1</b> | 0.0 |
| <i>mitochondria</i>            | <b>2.9</b> | 1.2 | <b>2.6</b> | 2.6 | <b>1.9</b> | 0.9 | <b>1.8</b> | 0.7 | <i>Mogibacteriaceae</i>      | <b>2.0</b> | 1.6 | <b>3.0</b> | 0.8 |
| <i>Lactococcus</i>             | <b>1.3</b> | 0.2 | <b>1.7</b> | 0.4 | <b>1.6</b> | 0.3 | <b>1.5</b> | 0.6 | <i>Bacillaceae</i>           | <b>2.2</b> | 1.6 | <b>2.7</b> | 1.0 |
| <i>Bifidobacteriaceae</i>      | <b>1.4</b> | 0.9 | <b>1.5</b> | 0.3 | <b>1.5</b> | 0.1 | <b>1.5</b> | 1.0 | <i>Peptostreptococcaceae</i> | <b>1.7</b> | 1.1 | <b>2.4</b> | 0.5 |
| <i>Clostridium</i>             | <b>0.4</b> | 0.2 | <b>0.5</b> | 0.5 | <b>0.8</b> | 0.6 | <b>0.9</b> | 0.7 | <i>Ruminococcaceae</i>       | <b>6.2</b> | 3.7 | <b>1.8</b> | 1.1 |
| <i>Bifidobacterium</i>         | <b>0.6</b> | 0.3 | <b>0.6</b> | 0.0 | <b>0.6</b> | 0.2 | <b>0.7</b> | 0.2 | <i>Geobacillus</i>           | <b>1.4</b> | 1.0 | <b>1.8</b> | 0.1 |
| <i>Bradyrhizobium</i>          | <b>0.1</b> | 0.1 | <b>0.2</b> | 0.1 | <b>0.2</b> | 0.2 | <b>0.7</b> | 0.9 | <i>Dorea</i>                 | <b>1.4</b> | 0.4 | <b>1.7</b> | 0.6 |
| <i>Delftia</i>                 | <b>0.2</b> | 0.2 | <b>0.6</b> | 0.4 | <b>0.2</b> | 0.2 | <b>0.6</b> | 0.6 | <i>Sediminibacterium</i>     | <b>1.1</b> | 0.9 | <b>1.5</b> | 0.7 |
| <i>Peptostreptococcaceae</i>   | <b>0.2</b> | 0.1 | <b>0.3</b> | 0.4 | <b>0.1</b> | 0.1 | <b>0.5</b> | 0.6 | <i>Caloramator</i>           | <b>1.1</b> | 0.8 | <b>1.4</b> | 0.3 |
| <i>Caulobacteraceae</i>        | <b>0.1</b> | 0.0 | <b>0.1</b> | 0.1 | <b>0.1</b> | 0.1 | <b>0.5</b> | 0.7 | <i>Carnobacterium</i>        | <b>0.9</b> | 0.8 | <b>1.3</b> | 0.8 |
| <i>Faecalibacterium</i>        | <b>0.1</b> | 0.1 | <b>0.0</b> | 0.1 | <b>0.1</b> | 0.1 | <b>0.4</b> | 0.5 | <i>Clostridiales</i>         | <b>1.5</b> | 1.0 | <b>1.2</b> | 0.9 |
| <i>Sphingobium</i>             | <b>0.0</b> | 0.0 | <b>0.2</b> | 0.2 | <b>0.2</b> | 0.1 | <b>0.4</b> | 0.6 | <i>Bacteroides</i>           | <b>5.4</b> | 3.8 | <b>1.2</b> | 0.9 |
| <i>Rhodococcus</i>             | <b>0.2</b> | 0.1 | <b>0.2</b> | 0.1 | <b>0.3</b> | 0.1 | <b>0.4</b> | 0.2 | <i>Delftia</i>               | <b>0.6</b> | 0.5 | <b>1.0</b> | 0.6 |
| <i>Lactobacillales</i>         | <b>0.6</b> | 0.1 | <b>0.4</b> | 0.0 | <b>0.3</b> | 0.1 | <b>0.4</b> | 0.3 | <i>Sphingobium</i>           | <b>0.7</b> | 0.6 | <b>1.0</b> | 0.5 |
| <i>Sporanaerobacter</i>        | <b>0.2</b> | 0.1 | <b>0.2</b> | 0.1 | <b>0.2</b> | 0.2 | <b>0.4</b> | 0.4 | <i>Anaerobacillus</i>        | <b>0.6</b> | 0.6 | <b>0.8</b> | 0.3 |
| <i>Blautia</i>                 | <b>0.2</b> | 0.2 | <b>0.1</b> | 0.1 | <b>0.1</b> | 0.1 | <b>0.4</b> | 0.4 | <i>Lachnospira</i>           | <b>1.0</b> | 0.8 | <b>0.8</b> | 1.0 |
| <i>Solibacterales</i>          | <b>0.2</b> | 0.1 | <b>0.1</b> | 0.1 | <b>0.2</b> | 0.2 | <b>0.4</b> | 0.5 | <i>Streptophyta</i>          | <b>0.2</b> | 0.1 | <b>0.7</b> | 0.8 |
| <i>Sphingomonas</i>            | <b>0.1</b> | 0.1 | <b>0.2</b> | 0.2 | <b>0.1</b> | 0.1 | <b>0.4</b> | 0.5 | <i>Faecalibacterium</i>      | <b>2.1</b> | 2.6 | <b>0.7</b> | 0.5 |
| <i>Ellin6513</i>               | <b>0.1</b> | 0.1 | <b>0.1</b> | 0.1 | <b>0.1</b> | 0.0 | <b>0.4</b> | 0.6 | <i>Caulobacteraceae</i>      | <b>0.5</b> | 0.4 | <b>0.6</b> | 0.2 |
| <i>Ruminococcus</i>            | <b>0.1</b> | 0.0 | <b>0.2</b> | 0.1 | <b>0.1</b> | 0.0 | <b>0.4</b> | 0.0 | <i>Akkermansia</i>           | <b>2.3</b> | 1.2 | <b>0.6</b> | 0.5 |
| <i>Lachnospiraceae</i>         | <b>0.2</b> | 0.1 | <b>0.2</b> | 0.2 | <b>0.2</b> | 0.1 | <b>0.3</b> | 0.3 | <i>Methylobacterium</i>      | <b>0.4</b> | 0.3 | <b>0.5</b> | 0.3 |
| <i>Lactobacillaceae</i>        | <b>0.3</b> | 0.1 | <b>0.2</b> | 0.1 | <b>0.3</b> | 0.2 | <b>0.3</b> | 0.3 | <i>Eubacteriaceae; Other</i> | <b>0.4</b> | 0.2 | <b>0.5</b> | 0.3 |
| <i>Clostridiaceae</i>          | <b>0.0</b> | 0.1 | <b>0.0</b> | 0.0 | <b>0.0</b> | 0.0 | <b>0.3</b> | 0.3 | <i>Vagococcus</i>            | <b>0.4</b> | 0.3 | <b>0.5</b> | 0.4 |
| <i>Conexibacteraceae</i>       | <b>0.0</b> | 0.1 | <b>0.1</b> | 0.1 | <b>0.0</b> | 0.0 | <b>0.3</b> | 0.2 | <i>Epulopiscium</i>          | <b>0.3</b> | 0.2 | <b>0.5</b> | 0.2 |
| <i>MLE1-12</i>                 | <b>0.0</b> | 0.0 | <b>0.0</b> | 0.0 | <b>0.0</b> | 0.0 | <b>0.2</b> | 0.4 | <i>Lactobacillus</i>         | <b>0.8</b> | 0.6 | <b>0.4</b> | 0.5 |
| <i>Bacillales</i>              | <b>0.1</b> | 0.0 | <b>0.1</b> | 0.2 | <b>0.2</b> | 0.1 | <b>0.2</b> | 0.3 | <i>Ralstonia</i>             | <b>0.2</b> | 0.2 | <b>0.4</b> | 0.5 |
| <i>Sporosarcina</i>            | <b>0.1</b> | 0.1 | <b>0.1</b> | 0.0 | <b>0.2</b> | 0.1 | <b>0.2</b> | 0.2 | <i>Rikenellaceae</i>         | <b>1.7</b> | 0.5 | <b>0.4</b> | 0.6 |
| <i>Thermogemmatissporaceae</i> | <b>0.0</b> | 0.0 | <b>0.0</b> | 0.0 | <b>0.0</b> | 0.0 | <b>0.2</b> | 0.3 | <i>Myroides</i>              | <b>0.2</b> | 0.2 | <b>0.4</b> | 0.1 |
| <i>Solibacillus</i>            | <b>0.0</b> | 0.0 | <b>0.0</b> | 0.0 | <b>0.0</b> | 0.0 | <b>0.2</b> | 0.4 | <i>Streptococcus</i>         | <b>0.7</b> | 0.6 | <b>0.4</b> | 0.4 |

|                               |            |     |            |     |            |     |            |     |                                |            |     |            |     |
|-------------------------------|------------|-----|------------|-----|------------|-----|------------|-----|--------------------------------|------------|-----|------------|-----|
| <i>Ruminococcaceae</i>        | <b>0.1</b> | 0.1 | <b>0.1</b> | 0.1 | <b>0.3</b> | 0.0 | <b>0.2</b> | 0.2 | <i>Blautia</i>                 | <b>1.3</b> | 1.7 | <b>0.4</b> | 0.2 |
| <i>Curtobacterium</i>         | <b>0.3</b> | 0.2 | <b>0.3</b> | 0.1 | <b>0.2</b> | 0.1 | <b>0.2</b> | 0.1 | <i>Ruminococcus</i>            | <b>1.1</b> | 0.5 | <b>0.4</b> | 0.0 |
| <i>Virgibacillus</i>          | <b>0.1</b> | 0.1 | <b>0.1</b> | 0.0 | <b>0.0</b> | 0.0 | <b>0.2</b> | 0.2 | <i>Roseburia</i>               | <b>0.5</b> | 0.4 | <b>0.4</b> | 0.1 |
| <i>TM7-1</i>                  | <b>0.0</b> | 0.0 | <b>0.0</b> | 0.0 | <b>0.0</b> | 0.0 | <b>0.2</b> | 0.3 | <i>Bifidobacterium</i>         | <b>1.8</b> | 2.8 | <b>0.3</b> | 0.1 |
| <i>Enterococcus</i>           | <b>0.1</b> | 0.1 | <b>0.1</b> | 0.1 | <b>0.2</b> | 0.1 | <b>0.2</b> | 0.2 | <i>Clostridiaceae</i>          | <b>0.3</b> | 0.1 | <b>0.3</b> | 0.1 |
| <i>Anaerobacillus</i>         | <b>0.0</b> | 0.0 | <b>0.1</b> | 0.1 | <b>0.1</b> | 0.1 | <b>0.2</b> | 0.3 | <i>Eggerthella</i>             | <b>0.3</b> | 0.2 | <b>0.3</b> | 0.0 |
| <i>Ellin329</i>               | <b>0.0</b> | 0.1 | <b>0.0</b> | 0.0 | <b>0.0</b> | 0.0 | <b>0.2</b> | 0.3 | <i>Collinsella</i>             | <b>0.5</b> | 0.5 | <b>0.3</b> | 0.2 |
| <i>Sediminibacterium</i>      | <b>0.2</b> | 0.1 | <b>0.1</b> | 0.2 | <b>0.1</b> | 0.1 | <b>0.1</b> | 0.2 | <i>Enhydrobacter</i>           | <b>0.1</b> | 0.1 | <b>0.3</b> | 0.4 |
| <i>Carnobacterium</i>         | <b>0.1</b> | 0.1 | <b>0.1</b> | 0.1 | <b>0.1</b> | 0.0 | <b>0.1</b> | 0.0 | <i>Prevotella</i>              | <b>0.2</b> | 0.2 | <b>0.3</b> | 0.4 |
| <i>Methylobacterium</i>       | <b>0.0</b> | 0.0 | <b>0.1</b> | 0.1 | <b>0.0</b> | 0.0 | <b>0.1</b> | 0.2 | <i>Parabacteroides</i>         | <b>0.7</b> | 0.5 | <b>0.3</b> | 0.5 |
| <i>Ralstonia</i>              | <b>0.1</b> | 0.0 | <b>0.1</b> | 0.1 | <b>0.0</b> | 0.0 | <b>0.1</b> | 0.2 | <i>Bradyrhizobium</i>          | <b>0.2</b> | 0.2 | <b>0.3</b> | 0.0 |
| <i>WPS-2</i>                  | <b>0.0</b> | 0.0 | <b>0.0</b> | 0.0 | <b>0.0</b> | 0.0 | <b>0.1</b> | 0.2 | <i>Corynebacterium</i>         | <b>0.3</b> | 0.4 | <b>0.3</b> | 0.4 |
| <i>Tissierella_Soehngenia</i> | <b>0.1</b> | 0.1 | <b>0.0</b> | 0.0 | <b>0.0</b> | 0.0 | <b>0.1</b> | 0.2 | <i>Bacillales</i>              | <b>0.2</b> | 0.2 | <b>0.3</b> | 0.1 |
| <i>Collinsella</i>            | <b>0.1</b> | 0.1 | <b>0.0</b> | 0.0 | <b>0.2</b> | 0.3 | <b>0.1</b> | 0.1 | <i>Lysinibacillus</i>          | <b>0.2</b> | 0.2 | <b>0.2</b> | 0.1 |
| <i>Bacteroides</i>            | <b>0.1</b> | 0.1 | <b>0.1</b> | 0.0 | <b>0.1</b> | 0.1 | <b>0.1</b> | 0.1 | <i>Phascolarctobacterium</i>   | <b>0.4</b> | 0.4 | <b>0.2</b> | 0.2 |
| <i>Planctomyces</i>           | <b>0.0</b> | 0.0 | <b>0.0</b> | 0.0 | <b>0.0</b> | 0.0 | <b>0.1</b> | 0.2 | <i>Paenibacillus</i>           | <b>0.1</b> | 0.2 | <b>0.2</b> | 0.1 |
| <i>Ochrobactrum</i>           | <b>0.0</b> | 0.0 | <b>0.1</b> | 0.1 | <b>0.1</b> | 0.0 | <b>0.1</b> | 0.1 | <i>Coproccoccus</i>            | <b>0.5</b> | 0.4 | <b>0.2</b> | 0.2 |
| <i>Staphylococcus</i>         | <b>0.2</b> | 0.1 | <b>0.3</b> | 0.2 | <b>0.1</b> | 0.0 | <b>0.1</b> | 0.1 | <i>MLE1-12</i>                 | <b>0.1</b> | 0.1 | <b>0.2</b> | 0.1 |
| <i>Pediococcus</i>            | <b>0.3</b> | 0.1 | <b>0.2</b> | 0.0 | <b>0.0</b> | 0.0 | <b>0.1</b> | 0.1 | <i>Oscillospira</i>            | <b>0.3</b> | 0.3 | <b>0.2</b> | 0.2 |
| <i>Peptostreptococcus</i>     | <b>0.1</b> | 0.2 | <b>0.0</b> | 0.0 | <b>0.0</b> | 0.0 | <b>0.1</b> | 0.1 | <i>Anaerostipes</i>            | <b>0.1</b> | 0.2 | <b>0.2</b> | 0.2 |
| <i>Ureibacillus</i>           | <b>0.0</b> | 0.0 | <b>0.0</b> | 0.1 | <b>0.1</b> | 0.1 | <b>0.1</b> | 0.0 | <i>Sphingomonas</i>            | <b>0.1</b> | 0.1 | <b>0.2</b> | 0.2 |
| <i>Enterobacteriaceae</i>     | <b>0.1</b> | 0.2 | <b>0.1</b> | 0.1 | <b>0.0</b> | 0.0 | <b>0.1</b> | 0.2 | <i>Acinetobacter</i>           | <b>0.1</b> | 0.1 | <b>0.2</b> | 0.0 |
| <i>JG30-KF-CM45</i>           | <b>0.0</b> | 0.0 | <b>0.0</b> | 0.0 | <b>0.0</b> | 0.0 | <b>0.1</b> | 0.2 | <i>Serratia</i>                | <b>0.1</b> | 0.1 | <b>0.2</b> | 0.2 |
| <i>Thermicanaceae</i>         | <b>0.0</b> | 0.0 | <b>0.0</b> | 0.0 | <b>0.0</b> | 0.0 | <b>0.1</b> | 0.2 | <i>mitochondria</i>            | <b>0.1</b> | 0.0 | <b>0.2</b> | 0.1 |
| <i>Rs-045</i>                 | <b>0.1</b> | 0.1 | <b>0.1</b> | 0.1 | <b>0.2</b> | 0.1 | <b>0.1</b> | 0.1 | <i>Anaerovorax</i>             | <b>0.1</b> | 0.1 | <b>0.2</b> | 0.1 |
| <i>Sinobacteraceae</i>        | <b>0.0</b> | 0.0 | <b>0.0</b> | 0.0 | <b>0.1</b> | 0.1 | <b>0.1</b> | 0.1 | <i>Staphylococcus</i>          | <b>0.1</b> | 0.2 | <b>0.2</b> | 0.2 |
| <i>Brevibacillus</i>          | <b>0.0</b> | 0.0 | <b>0.0</b> | 0.0 | <b>0.0</b> | 0.0 | <b>0.1</b> | 0.1 | <i>Ochrobactrum</i>            | <b>0.0</b> | 0.0 | <b>0.2</b> | 0.1 |
| <i>Erysipelotrichaceae</i>    | <b>0.0</b> | 0.0 | <b>0.0</b> | 0.0 | <b>0.0</b> | 0.0 | <b>0.1</b> | 0.1 | <i>Parachlamydia</i>           | <b>0.1</b> | 0.0 | <b>0.1</b> | 0.1 |
| <i>Pseudomonas</i>            | <b>0.0</b> | 0.0 | <b>0.0</b> | 0.1 | <b>0.0</b> | 0.0 | <b>0.1</b> | 0.1 | <i>Thermogemmatissporaceae</i> | <b>0.1</b> | 0.2 | <b>0.1</b> | 0.2 |
| <i>Acinetobacter</i>          | <b>0.0</b> | 0.0 | <b>0.1</b> | 0.1 | <b>0.0</b> | 0.0 | <b>0.1</b> | 0.1 | <i>Morganella</i>              | <b>0.0</b> | 0.0 | <b>0.1</b> | 0.1 |
| <i>Clostridiales</i>          | <b>0.1</b> | 0.0 | <b>0.0</b> | 0.0 | <b>0.2</b> | 0.1 | <b>0.1</b> | 0.1 | <i>Halomonas</i>               | <b>0.0</b> | 0.1 | <b>0.1</b> | 0.1 |
| <i>Bradyrhizobiaceae</i>      | <b>0.0</b> | 0.0 | <b>0.0</b> | 0.0 | <b>0.0</b> | 0.0 | <b>0.1</b> | 0.1 | <i>Ellin329</i>                | <b>0.1</b> | 0.1 | <b>0.1</b> | 0.1 |

|                          |            |     |            |     |            |     |            |     |                              |            |     |            |     |
|--------------------------|------------|-----|------------|-----|------------|-----|------------|-----|------------------------------|------------|-----|------------|-----|
| <i>Lysinibacillus</i>    | <b>0.0</b> | 0.1 | <b>0.1</b> | 0.1 | <b>0.1</b> | 0.1 | <b>0.1</b> | 0.0 | <i>Stenotrophomonas</i>      | <b>0.1</b> | 0.1 | <b>0.1</b> | 0.1 |
| <i>Saccharopolyspora</i> | <b>0.0</b> | 0.0 | <b>0.1</b> | 0.1 | <b>0.1</b> | 0.0 | <b>0.1</b> | 0.1 | <i>Jeotgalicoccus</i>        | <b>0.1</b> | 0.1 | <b>0.1</b> | 0.2 |
| <i>Megamonas</i>         | <b>0.0</b> | 0.0 | <b>0.0</b> | 0.0 | <b>0.0</b> | 0.0 | <b>0.1</b> | 0.1 | <i>Allobaculum</i>           | <b>0.1</b> | 0.1 | <b>0.1</b> | 0.1 |
| <i>Aneurinibacillus</i>  | <b>0.1</b> | 0.1 | <b>0.0</b> | 0.0 | <b>0.0</b> | 0.0 | <b>0.1</b> | 0.0 | <i>Ureibacillus</i>          | <b>0.1</b> | 0.1 | <b>0.1</b> | 0.0 |
| <i>Oxalobacteraceae</i>  | <b>0.0</b> | 0.0 | <b>0.0</b> | 0.0 | <b>0.0</b> | 0.0 | <b>0.1</b> | 0.1 | <i>Pseudomonas</i>           | <b>0.1</b> | 0.2 | <b>0.1</b> | 0.1 |
| <i>Akkermansia</i>       | <b>0.0</b> | 0.1 | <b>0.0</b> | 0.0 | <b>0.0</b> | 0.0 | <b>0.1</b> | 0.1 | <i>Leuconostocaceae</i>      | <b>0.1</b> | 0.0 | <b>0.1</b> | 0.1 |
| <i>Agrobacterium</i>     | <b>0.0</b> | 0.0 | <b>0.0</b> | 0.0 | <b>0.0</b> | 0.0 | <b>0.1</b> | 0.1 | <i>Fusobacterium</i>         | <b>0.1</b> | 0.1 | <b>0.1</b> | 0.0 |
| <i>Kurthia</i>           | <b>0.3</b> | 0.1 | <b>0.1</b> | 0.1 | <b>0.2</b> | 0.1 | <b>0.1</b> | 0.1 | <i>Parachlamydiaceae</i>     | <b>0.0</b> | 0.0 | <b>0.1</b> | 0.1 |
| <i>Myroides</i>          | <b>0.0</b> | 0.0 | <b>0.1</b> | 0.0 | <b>0.1</b> | 0.1 | <b>0.1</b> | 0.0 | <i>Christensenellaceae</i>   | <b>0.3</b> | 0.0 | <b>0.1</b> | 0.1 |
| <i>Microbacterium</i>    | <b>0.1</b> | 0.0 | <b>0.0</b> | 0.0 | <b>0.1</b> | 0.0 | <b>0.1</b> | 0.1 | <i>Solibacterales</i>        | <b>0.1</b> | 0.1 | <b>0.1</b> | 0.1 |
| <i>Micrococcaceae</i>    | <b>0.0</b> | 0.0 | <b>0.0</b> | 0.0 | <b>0.0</b> | 0.0 | <b>0.1</b> | 0.1 | <i>Sutterella</i>            | <b>0.4</b> | 0.4 | <b>0.1</b> | 0.1 |
| <i>Micrococcus</i>       | <b>0.0</b> | 0.0 | <b>0.0</b> | 0.0 | <b>0.0</b> | 0.0 | <b>0.1</b> | 0.1 | <i>Natronobacillus</i>       | <b>0.0</b> | 0.0 | <b>0.1</b> | 0.1 |
| <i>Mycetocola</i>        | <b>0.1</b> | 0.1 | <b>0.1</b> | 0.1 | <b>0.1</b> | 0.0 | <b>0.1</b> | 0.0 | <i>Sinobacteraceae</i>       | <b>0.0</b> | 0.0 | <b>0.1</b> | 0.1 |
| <i>Halomonas</i>         | <b>0.0</b> | 0.0 | <b>0.0</b> | 0.0 | <b>0.0</b> | 0.0 | <b>0.1</b> | 0.1 | <i>Dietzia</i>               | <b>0.1</b> | 0.1 | <b>0.1</b> | 0.1 |
| <i>Coriobacteriaceae</i> | <b>0.1</b> | 0.1 | <b>0.1</b> | 0.2 | <b>0.1</b> | 0.0 | <b>0.1</b> | 0.1 | <i>Paracoccus</i>            | <b>0.0</b> | 0.1 | <b>0.1</b> | 0.1 |
| <i>Ruminococcus</i>      | <b>0.0</b> | 0.0 | <b>0.1</b> | 0.1 | <b>0.0</b> | 0.0 | <b>0.1</b> | 0.0 | <i>Rhodococcus</i>           | <b>0.1</b> | 0.1 | <b>0.1</b> | 0.0 |
| <i>Frigoribacterium</i>  | <b>0.1</b> | 0.0 | <b>0.0</b> | 0.0 | <b>0.0</b> | 0.0 | <b>0.0</b> | 0.1 | <i>Lachnospiraceae;Other</i> | <b>0.0</b> | 0.1 | <b>0.1</b> | 0.0 |
| <i>Streptomyces</i>      | <b>0.1</b> | 0.1 | <b>0.0</b> | 0.1 | <b>0.0</b> | 0.0 | <b>0.0</b> | 0.1 | <i>Dechloromonas</i>         | <b>0.0</b> | 0.0 | <b>0.1</b> | 0.1 |
| <i>Tepidimicrobium</i>   | <b>0.0</b> | 0.0 | <b>0.1</b> | 0.0 | <b>0.0</b> | 0.0 | <b>0.0</b> | 0.1 | <i>Aneurinibacillus</i>      | <b>0.1</b> | 0.1 | <b>0.1</b> | 0.1 |
| <i>Peptoniphilus</i>     | <b>0.1</b> | 0.2 | <b>0.0</b> | 0.1 | <b>0.0</b> | 0.0 | <b>0.0</b> | 0.0 | <i>RF32</i>                  | <b>0.1</b> | 0.1 | <b>0.1</b> | 0.1 |
| <i>Vagococcus</i>        | <b>0.1</b> | 0.0 | <b>0.1</b> | 0.1 | <b>0.0</b> | 0.0 | <b>0.0</b> | 0.0 | <i>Enterococcus</i>          | <b>0.0</b> | 0.0 | <b>0.1</b> | 0.0 |
| <i>Brevibacterium</i>    | <b>0.0</b> | 0.0 | <b>0.0</b> | 0.1 | <b>0.1</b> | 0.1 | <b>0.0</b> | 0.0 | <i>Prevotella</i>            | <b>0.0</b> | 0.2 | <b>0.1</b> | 0.4 |
| <i>Tissierellaceae</i>   | <b>0.1</b> | 0.1 | <b>0.0</b> | 0.0 | <b>0.0</b> | 0.0 | <b>0.0</b> | 0.0 | <i>MND1</i>                  | <b>0.0</b> | 0.0 | <b>0.1</b> | 0.1 |
| <i>Paracoccus</i>        | <b>0.3</b> | 0.4 | <b>0.1</b> | 0.1 | <b>0.0</b> | 0.1 | <b>0.0</b> | 0.0 | <i>Barnesiellaceae</i>       | <b>0.2</b> | 0.2 | <b>0.1</b> | 0.1 |
| <i>Enhydrobacter</i>     | <b>0.3</b> | 0.5 | <b>0.0</b> | 0.0 | <b>0.0</b> | 0.0 | <b>0.0</b> | 0.0 | <i>Sporanaerobacter</i>      | <b>0.1</b> | 0.2 | <b>0.1</b> | 0.1 |
| <i>Planococcaceae</i>    | <b>0.0</b> | 0.0 | <b>0.1</b> | 0.0 | <b>0.0</b> | 0.0 | <b>0.0</b> | 0.0 | <i>Actinomyces</i>           | <b>0.1</b> | 0.1 | <b>0.1</b> | 0.1 |
| <i>Paraprevotella</i>    | <b>0.0</b> | 0.0 | <b>0.1</b> | 0.2 | <b>0.0</b> | 0.0 | <b>0.0</b> | 0.0 | <i>Ellin6513</i>             | <b>0.0</b> | 0.0 | <b>0.1</b> | 0.0 |
| <i>Roseomonas</i>        | <b>0.2</b> | 0.3 | <b>0.0</b> | 0.0 | <b>0.0</b> | 0.0 | <b>0.0</b> | 0.0 | <i>AF12</i>                  | <b>0.0</b> | 0.0 | <b>0.1</b> | 0.1 |
| <i>Unassigned</i>        | <b>0.1</b> | 0.1 | <b>0.1</b> | 0.0 | <b>0.1</b> | 0.0 | <b>0.2</b> | 0.2 | <i>Rubellimicrobium</i>      | <b>0.0</b> | 0.0 | <b>0.1</b> | 0.1 |
|                          |            |     |            |     |            |     |            |     | <i>Chryseobacterium</i>      | <b>0.0</b> | 0.1 | <b>0.1</b> | 0.1 |
|                          |            |     |            |     |            |     |            |     | <i>Rhodocyclaceae</i>        | <b>0.0</b> | 0.0 | <b>0.1</b> | 0.1 |
|                          |            |     |            |     |            |     |            |     | <i>Tepidimicrobium</i>       | <b>0.1</b> | 0.1 | <b>0.1</b> | 0.1 |

|                                     |            |     |            |     |
|-------------------------------------|------------|-----|------------|-----|
| <i>Pseudoramibacter_Eubacterium</i> | <b>0.1</b> | 0.0 | <b>0.1</b> | 0.0 |
| <i>Pseudomonadaceae</i>             | <b>0.0</b> | 0.0 | <b>0.1</b> | 0.0 |
| <i>Conexibacteraceae</i>            | <b>0.0</b> | 0.0 | <b>0.1</b> | 0.1 |
| <i>Pirellulaceae</i>                | <b>0.0</b> | 0.0 | <b>0.1</b> | 0.1 |
| <i>Butyricimonas</i>                | <b>0.0</b> | 0.0 | <b>0.1</b> | 0.0 |
| <i>Mycobacterium</i>                | <b>0.0</b> | 0.0 | <b>0.1</b> | 0.1 |
| <i>Paludibacter</i>                 | <b>0.1</b> | 0.0 | <b>0.0</b> | 0.0 |
| <i>Thermoactinomyces</i>            | <b>0.1</b> | 0.1 | <b>0.0</b> | 0.0 |
| <i>Ruminococcus</i>                 | <b>0.3</b> | 0.5 | <b>0.0</b> | 0.0 |
| <i>Anaerotruncus</i>                | <b>0.1</b> | 0.1 | <b>0.0</b> | 0.1 |
| <i>Luteimonas</i>                   | <b>0.1</b> | 0.1 | <b>0.0</b> | 0.1 |
| <i>Dialister</i>                    | <b>0.5</b> | 0.8 | <b>0.0</b> | 0.0 |
| <i>Acidaminococcus</i>              | <b>0.1</b> | 0.1 | <b>0.0</b> | 0.0 |
| <i>Tissierellaceae</i>              | <b>0.1</b> | 0.0 | <b>0.0</b> | 0.0 |
| <i>Turcibacter</i>                  | <b>0.1</b> | 0.1 | <b>0.0</b> | 0.0 |
| <i>Odoribacter</i>                  | <b>0.1</b> | 0.1 | <b>0.0</b> | 0.0 |
| <i>Bilophila</i>                    | <b>0.3</b> | 0.5 | <b>0.0</b> | 0.0 |
| <i>Catenibacterium</i>              | <b>0.1</b> | 0.2 | <b>0.0</b> | 0.0 |
| <i>Anaerobiospirillum</i>           | <b>0.2</b> | 0.3 | <b>0.0</b> | 0.0 |
| <i>Slackia</i>                      | <b>0.1</b> | 0.2 | <b>0.0</b> | 0.0 |
| <i>Megamonas</i>                    | <b>0.1</b> | 0.1 | <b>0.0</b> | 0.0 |
| <i>Other</i>                        | <b>1.3</b> | 1.2 | <b>1.2</b> | 1.3 |

---

**Supplementary Table S2.** Statistical analysis on gut microbiota detected in the hindgut content of European sea bass fed different diets at 71 days (pre-suboptimal rearing condition), and at 81 days (post-suboptimal rearing condition). All the *P* values were appropriately corrected for multiple comparisons using the Benjamini-Hochberg method. False discovery rate (FDR)  $\leq 0.05$  was considered as statistically significant. D0= 0 mg Kg<sup>-1</sup> organic acids and nature-identical compounds (OA, NIC) ; D250 = 250 mg Kg<sup>-1</sup>OA, NIC; D500 = 500 mg Kg<sup>-1</sup> OA, NIC; D1000 = 1000mg Kg<sup>-1</sup> OA, NIC. D0vsD250=comparisons between D0 and D250 genera under pre-suboptimal rearing condition; D0vsD500=comparisons between D0 and D500 genera under pre-suboptimal rearing condition; D0vsD1000=comparisons between D0 and D1000 genera under pre-suboptimal rearing condition and post-suboptimal rearing condition; D0vsD0=comparisons between pre-suboptimal rearing condition and post- suboptimal rearing condition D0 genera; D1000vsD1000=comparisons between pre- suboptimal rearing condition and post- suboptimal rearing condition D1000 genera.

| Diet                         | Pre-suboptimal rearing condition |            |             | Post-suboptimal rearing condition |     | Pre-Post suboptimal rearing condition |                |
|------------------------------|----------------------------------|------------|-------------|-----------------------------------|-----|---------------------------------------|----------------|
|                              | D0 vs D250                       | D0 vs D500 | D0 vs D1000 | D0 vs D1000                       |     | D0 vs D0                              | D1000 vs D1000 |
| Genus                        | P- value                         |            |             | P-value                           |     | P-value                               |                |
| <i>Lactobacillus</i>         | 0.66                             | 0.08       | 0.66        | <i>Enterobacteriaceae</i>         | 1.0 | <i>Rikenellaceae</i>                  | 0.06 0.08      |
| <i>Leuconostocaceae</i>      | 0.08                             | 0.08       | 0.66        | <i>Eubacterium</i>                | 0.7 | <i>Myroides</i>                       | 0.18 0.1       |
| <i>Streptococcus</i>         | 1.0                              | 0.66       | 1.0         | <i>Bacillus</i>                   | 0.7 | <i>Acinetobacter</i>                  | 0.06 0.7       |
| <i>Bacillus</i>              | 1.0                              | 1.0        | 0.38        | <i>Clostridium</i>                | 0.7 | <i>Enterococcus</i>                   | 0.08 0.7       |
| <i>Corynebacterium</i>       | 0.08                             | 0.19       | 0.08        | <i>Erysipelotrichaceae</i>        | 0.4 | <i>Planctomyces</i>                   | 0.2 0.5        |
| <i>Leuconostoc</i>           | 0.12                             | 0.66       | 1.0         | <i>Bacteroides</i>                | 0.2 | <i>Paraprevotella</i>                 | 0.64 NA        |
| <i>Bacillaceae</i>           | 0.66                             | 0.38       | 0.38        | <i>Coriobacteriaceae</i>          | 1.0 | <i>Christensenellaceae</i>            | 0.08 0.06      |
| <i>Streptophyta</i>          | 0.66                             | 0.19       | 0.08        | <i>Lachnospiraceae</i>            | 1.0 | <i>Morganella</i>                     | 0.18 0.06      |
| <i>Geobacillus</i>           | 0.38                             | 0.38       | 0.38        | <i>Mogibacteriaceae</i>           | 0.4 | <i>Akkermansia</i>                    | 0.08 0.08      |
| <i>mitochondria</i>          | 0.66                             | 0.19       | 0.38        | <i>Bacillaceae</i>                | 0.4 | <i>Ruminococcaceae</i>                | 0.08 0.1       |
| <i>Lactococcus</i>           | 0.19                             | 0.38       | 0.66        | <i>Peptostreptococcaceae</i>      | 0.4 | <i>Bacteroides</i>                    | 0.1 0.1        |
| <i>Bifidobacteriaceae</i>    | 0.82                             | 0.66       | 1.0         | <i>Ruminococcaceae</i>            | 0.2 | <i>Streptophyta</i>                   | 0.1 0.2        |
| <i>Clostridium</i>           | 1.0                              | 0.38       | 0.27        | <i>Geobacillus</i>                | 1.0 | <i>Sinobacteraceae</i>                | 0.38 1.0       |
| <i>Bifidobacterium</i>       | 1.0                              | 1.0        | 0.66        | <i>Dorea</i>                      | 1.0 | <i>Propionibacteriaceae</i>           | 0.08 0.38      |
| <i>Bradyrhizobium</i>        | 1.0                              | 0.82       | 0.38        | <i>Sediminibacterium</i>          | 1.0 | <i>Lactobacillales</i>                | 0.08 0.08      |
| <i>Delftia</i>               | 0.66                             | 1.0        | 0.38        | <i>Caloramator</i>                | 1.0 | <i>Leuconostoc</i>                    | 0.08 0.08      |
| <i>Peptostreptococcaceae</i> | 1.0                              | 0.26       | 0.66        | <i>Carnobacterium</i>             | 0.7 | <i>Legionellaceae</i>                 | 1.0 0.5        |
| <i>Caulobacteraceae</i>      | 0.66                             | 0.82       | 0.66        | <i>Clostridiales</i>              | 0.7 | <i>Natronobacillus</i>                | 1.0 0.51       |

|                           |      |      |      |                              |      |                               |      |      |
|---------------------------|------|------|------|------------------------------|------|-------------------------------|------|------|
| <i>Faecalibacterium</i>   | 0.37 | 0.64 | 0.66 | <i>Bacteroides</i>           | 0.2  | <i>mitochondria</i>           | 0.08 | 0.1  |
| <i>Sphingobium</i>        | 0.64 | 0.2  | 0.06 | <i>Delftia</i>               | 1.0  | <i>Ellin6513</i>              | 0.07 | 1.0  |
| <i>Rhodococcus</i>        | 1.0  | 0.66 | 0.19 | <i>Sphingobium</i>           | 0.7  | <i>Coproccoccus</i>           | 0.1  | 0.06 |
| <i>Lactobacillales</i>    | 0.08 | 0.08 | 0.82 | <i>Anaerobacillus</i>        | 0.4  | <i>Mogibacteriaceae</i>       | 0.08 | 0.06 |
| <i>Sporanaerobacter</i>   | 0.66 | 1.0  | 0.38 | <i>Lachnospira</i>           | 0.4  | <i>Parachlamydia</i>          | 0.06 | 0.06 |
| <i>Blautia</i>            | 1.0  | 0.38 | 0.66 | <i>Streptophyta</i>          | 0.2  | <i>Lachnospira</i>            | 0.06 | 0.06 |
| <i>Solibacterales</i>     | 0.38 | 1.0  | 1.0  | <i>Faecalibacterium</i>      | 1.0  | <i>Anaerobacillus</i>         | 0.08 | 0.08 |
| <i>Sphingomonas</i>       | 1.0  | 0.82 | 1.0  | <i>Caulobacteraceae</i>      | 0.5  | <i>Erysipelotrichaceae</i>    | 0.1  | 0.1  |
| <i>Ellin6513</i>          | 1.0  | 0.38 | 0.66 | <i>Akkermansia</i>           | 0.2  | <i>Lactobacillus</i>          | 0.1  | 0.1  |
| <i>Ruminococcus</i>       | 0.38 | 0.66 | 0.08 | <i>Methylobacterium</i>      | 0.7  | <i>Peptostreptococcaceae</i>  | 0.1  | 0.1  |
| <i>Lachnospiraceae</i>    | 1.0  | 1.0  | 0.66 | <i>Vagococcus</i>            | 1.0  | <i>Parabacteroides</i>        | 0.08 | 0.2  |
| <i>Lactobacillaceae</i>   | 0.38 | 1.0  | 1.0  | <i>Lactobacillus</i>         | 0.4  | <i>Ochrobactrum</i>           | 1.0  | 0.7  |
| <i>Clostridiaceae</i>     | 1.0  | 0.66 | 0.18 | <i>Ralstonia</i>             | 1.0  | <i>Ruminococcus</i>           | 0.1  | 1.0  |
| <i>Conexibacteraceae</i>  | 0.64 | 0.64 | 0.08 | <i>Rikenellaceae</i>         | 0.1  | <i>Ruminococcus</i>           | 0.08 | 1.0  |
| <i>Bacillales</i>         | 1.0  | 0.27 | 0.38 | <i>Myroides</i>              | 0.1  | <i>Virgibacillus</i>          | 0.07 | 0.08 |
| <i>Sporosarcina</i>       | 0.66 | 0.65 | 0.38 | <i>Streptococcus</i>         | 0.5  | <i>Curtobacterium</i>         | 0.1  | 0.08 |
| <i>Ruminococcaceae</i>    | 1.0  | 0.08 | 1.0  | <i>Blautia</i>               | 0.7  | <i>Comamonadaceae</i>         | 1.0  | 0.82 |
| <i>Curtobacterium</i>     | 1.0  | 0.38 | 0.66 | <i>Ruminococcus</i>          | 0.4  | <i>Adlercreutzia</i>          | 0.2  | 1.0  |
| <i>Enterococcus</i>       | 1.0  | 0.19 | 0.82 | <i>Roseburia</i>             | 0.7  | <i>Solibacillus</i>           | 0.2  | 1.0  |
| <i>Anaerobacillus</i>     | 0.5  | 0.08 | 1.0  | <i>Bifidobacterium</i>       | 1.0  | <i>Janthinobacterium</i>      | 0.64 | 1.0  |
| <i>Sediminibacterium</i>  | 1.0  | 0.51 | 1.0  | <i>Clostridiaceae</i>        | 0.7  | <i>Rubellimicrobium</i>       | 0.19 | 0.35 |
| <i>Carnobacterium</i>     | 0.51 | 0.82 | 1.0  | <i>Eggerthella</i>           | 0.7  | <i>Dechloromonas</i>          | 0.65 | 0.38 |
| <i>Ralstonia</i>          | 0.82 | 0.51 | 1.0  | <i>Collinsella</i>           | 1.0  | <i>Megamonas</i>              | 0.5  | 0.2  |
| <i>Collinsella</i>        | 0.5  | 1.0  | 0.38 | <i>Enhydrobacter</i>         | 1.0  | <i>Brevibacillus</i>          | 0.65 | 0.2  |
| <i>Bacteroides</i>        | 0.38 | 0.27 | 1.0  | <i>Prevotella</i>            | 0.2  | <i>Peptostreptococcus</i>     | 0.35 | 0.2  |
| <i>Ochrobactrum</i>       | 0.66 | 0.27 | 0.66 | <i>Parabacteroides</i>       | 0.4  | <i>Pediococcus</i>            | 0.06 | 0.35 |
| <i>Staphylococcus</i>     | 0.38 | 0.51 | 0.66 | <i>Bradyrhizobium</i>        | 0.7  | <i>Tissierella_Soehngenia</i> | 0.06 | 0.35 |
| <i>Pediococcus</i>        | 0.35 | 0.08 | 0.08 | <i>Corynebacterium</i>       | 1.0  | <i>Lactobacillaceae</i>       | 0.06 | 0.35 |
| <i>Ureibacillus</i>       | 0.66 | 0.66 | 0.12 | <i>Bacillales</i>            | 0.16 | <i>Myxococcales</i>           | 0.2  | 0.35 |
| <i>Enterobacteriaceae</i> | 1.0  | 1.0  | 1.0  | <i>Lysinibacillus</i>        | 1.0  | <i>Jonesiaceae</i>            | 0.5  | 0.5  |
| <i>Rs-045</i>             | 0.65 | 0.19 | 0.65 | <i>Phascolarctobacterium</i> | 0.0  | <i>Slackia</i>                | 0.5  | 0.5  |
| <i>Sinobacteraceae</i>    | 0.81 | 0.66 | 0.35 | <i>Paenibacillus</i>         | 0.66 | <i>Trichococcus</i>           | 0.5  | 0.5  |



|                          |      |      |      |                               |      |                               |      |      |
|--------------------------|------|------|------|-------------------------------|------|-------------------------------|------|------|
| <i>Clostridiales</i>     | 1.0  | 0.19 | 0.66 | <i>Coprococcus</i>            | 0.4  | <i>Roseomonas</i>             | 0.5  | 0.5  |
| <i>Bradyrhizobiaceae</i> | 1.0  | 0.82 | 0.38 | <i>MLE1-12</i>                | 0.7  | <i>Shewanella</i>             | 0.5  | 0.5  |
| <i>Lysinibacillus</i>    | 0.35 | 0.48 | 0.5  | <i>Oscillospira</i>           | 1.0  | <i>TM7-1</i>                  | 0.5  | 0.5  |
| <i>Saccharopolyspora</i> | 0.82 | 0.81 | 0.66 | <i>Anaerostipes</i>           | 0.82 | <i>Arthrobacter</i>           | 0.64 | 0.5  |
| <i>Oxalobacteraceae</i>  | 0.82 | 0.51 | 1.0  | <i>Sphingomonas</i>           | 0.82 | <i>Planococcaceae</i>         | NA   | 0.5  |
| <i>Kurthia</i>           | 0.08 | 0.38 | 0.08 | <i>Acinetobacter</i>          | 0.1  | <i>ZB2</i>                    | NA   | 0.5  |
| <i>Coriobacteriaceae</i> | 0.66 | 0.65 | 0.38 | <i>mitochondria</i>           | 0.38 | <i>Brevundimonas</i>          | NA   | 0.5  |
| <i>Streptomyces</i>      | 0.27 | 0.27 | 0.27 | <i>Staphylococcus</i>         | 0.66 | <i>Rhodoplanes</i>            | NA   | 0.5  |
| <i>Vagococcus</i>        | 0.82 | 0.18 | 0.12 | <i>Ochrobactrum</i>           | 0.4  | <i>Phyllobacterium</i>        | NA   | 0.5  |
| <i>Tissierellaceae</i>   | 0.66 | 1.0  | 0.38 | <i>Parachlamydia</i>          | 0.4  | <i>Edaphobacter</i>           | NA   | 1.0  |
| <i>Unassigned</i>        | 0.18 | 0.26 | 1.0  | <i>Thermogemmatisporaceae</i> | 1.0  | <i>Devosia</i>                | NA   | 1.0  |
|                          |      |      |      | <i>Morganella</i>             | 0.2  | <i>Acetobacteraceae</i>       | NA   | 1.0  |
|                          |      |      |      | <i>Halomonas</i>              | 0.51 | <i>Nocardioideaceae</i>       | 0.5  | 1.0  |
|                          |      |      |      | <i>Ellin329</i>               | 1.0  | <i>Anaerococcus</i>           | 0.5  | 1.0  |
|                          |      |      |      | <i>Stenotrophomonas</i>       | 0.51 | <i>Agrobacterium</i>          | 0.5  | 1.0  |
|                          |      |      |      | <i>Jeotgalicoccus</i>         | 1.0  | <i>0319-6G20</i>              | 0.5  | 1.0  |
|                          |      |      |      | <i>Ureibacillus</i>           | 0.51 | <i>Rummeliibacillus</i>       | 0.08 | NA   |
|                          |      |      |      | <i>Pseudomonas</i>            | 1.0  | <i>Solirubrobacterales</i>    | 0.5  | NA   |
|                          |      |      |      | <i>Leuconostocaceae</i>       | 1.0  | <i>Gemmata</i>                | 0.5  | NA   |
|                          |      |      |      | <i>Parachlamydiaceae</i>      | 0.4  | <i>Gluconacetobacter</i>      | 0.5  | NA   |
|                          |      |      |      | <i>Christensenellaceae</i>    | 0.2  | <i>Stenotrophomonas</i>       | 0.35 | 0.08 |
|                          |      |      |      | <i>Solibacterales</i>         | 1.0  | <i>Halomonas</i>              | 0.35 | 0.38 |
|                          |      |      |      | <i>Natronobacillus</i>        | 0.35 | <i>Tissierellaceae</i>        | 1.0  | 0.64 |
|                          |      |      |      | <i>Sinobacteraceae</i>        | 0.2  | <i>Ureibacillus</i>           | 0.7  | 1.0  |
|                          |      |      |      | <i>Dietzia</i>                | 0.82 | <i>Caldicoprobacter</i>       | 0.35 | 0.19 |
|                          |      |      |      | <i>Paracoccus</i>             | 0.7  | <i>Conexibacteraceae</i>      | 0.37 | 0.1  |
|                          |      |      |      | <i>Rhodococcus</i>            | 0.66 | <i>Lactococcus</i>            | 0.08 | 0.1  |
|                          |      |      |      | <i>Lachnospiraceae; Other</i> | 0.65 | <i>SJA-4</i>                  | 0.2  | 0.5  |
|                          |      |      |      | <i>Dechloromonas</i>          | 0.5  | <i>Barnesiellaceae</i>        | 0.2  | 1.0  |
|                          |      |      |      | <i>Aneurinibacillus</i>       | 1.0  | <i>Turicibacter</i>           | 1.0  | 1.0  |
|                          |      |      |      | <i>Enterococcus</i>           | 0.16 | <i>Lachnospiraceae; Other</i> | 0.5  | 0.07 |
|                          |      |      |      | <i>Prevotella</i>             | 0.2  | <i>Sporosarcina</i>           | 0.38 | 0.1  |

|                                     |      |                                     |      |      |
|-------------------------------------|------|-------------------------------------|------|------|
| <i>Barnesiellaceae</i>              | 0.64 | <i>Bacillaceae;Other</i>            | 0.64 | 0.82 |
| <i>Sporanaerobacter</i>             | 1.0  | <i>Anoxybacillus</i>                | 1.0  | 0.06 |
| <i>Actinomyces</i>                  | 1.0  | <i>Rhodococcus</i>                  | 0.1  | 0.08 |
| <i>Ellin6513</i>                    | 0.38 | <i>Paenibacillus</i>                | 1.0  | 0.08 |
| <i>Rubellimicrobium</i>             | 0.5  | <i>Bradyrhizobium</i>               | 1.0  | 0.66 |
| <i>Chryseobacterium</i>             | 1.0  | <i>Staphylococcus</i>               | 0.66 | 1.0  |
| <i>Rhodocyclaceae</i>               | 0.5  | <i>Paracoccus</i>                   | 0.82 | 0.06 |
| <i>Tepidimicrobium</i>              | 1.0  | <i>Eggerthella</i>                  | 0.2  | 0.06 |
| <i>Pseudoramibacter_Eubacterium</i> | 1.0  | <i>Roseburia</i>                    | 0.06 | 0.08 |
| <i>Pseudomonadaceae</i>             | 1.0  | <i>Eubacterium</i>                  | 0.08 | 0.08 |
| <i>Conexibacteraceae</i>            | 0.64 | <i>Clostridium</i>                  | 0.1  | 0.1  |
| <i>Pirellulaceae</i>                | 1.0  | <i>Clostridiales</i>                | 0.1  | 0.1  |
| <i>Ruminococcus</i>                 | 0.4  | <i>Carnobacterium</i>               | 0.1  | 0.1  |
| <i>Acidaminococcus</i>              | 1.0  | <i>Methylobacterium</i>             | 0.2  | 0.2  |
| <i>Tissierellaceae</i>              | 0.51 | <i>Sphingobium</i>                  | 0.06 | 0.4  |
| <i>Turcibacter</i>                  | 0.64 | <i>Bacillus</i>                     | 1.0  | 0.7  |
| <i>Bilophila</i>                    | 1.0  | <i>MLE1-12</i>                      | 0.18 | 0.7  |
| <i>Slackia</i>                      | 0.5  | <i>Blautia</i>                      | 0.4  | 0.7  |
| <i>Megamonas</i>                    | 0.5  | <i>Novosphingobium</i>              | 0.35 | 0.19 |
|                                     |      | <i>Erwinia</i>                      | 0.5  | 0.2  |
|                                     |      | <i>Peptoniphilus</i>                | 0.5  | 1.0  |
|                                     |      | <i>Phascolarctobacterium</i>        | 0.35 | 0.06 |
|                                     |      | <i>Anaerostipes</i>                 | 0.35 | 0.2  |
|                                     |      | <i>Dietzia</i>                      | 0.18 | 0.64 |
|                                     |      | <i>Sphingomonas</i>                 | 0.7  | 1.0  |
|                                     |      | <i>Enhydrobacter</i>                | 1.0  | 0.06 |
|                                     |      | <i>Pseudoramibacter_Eubacterium</i> | 0.06 | 0.06 |
|                                     |      | <i>Oscillospira</i>                 | 0.06 | 0.06 |
|                                     |      | <i>Vagococcus</i>                   | 0.1  | 0.08 |
|                                     |      | <i>Lysinibacillus</i>               | 0.18 | 0.08 |
|                                     |      | <i>Caloramator</i>                  | 0.06 | 0.08 |
|                                     |      | <i>Dorea</i>                        | 0.1  | 0.08 |

|                           |      |      |
|---------------------------|------|------|
| <i>Bifidobacteriaceae</i> | 0.08 | 0.08 |
| <i>Corynebacterium</i>    | 0.1  | 0.1  |
| <i>Sporanaerobacter</i>   | 0.37 | 0.1  |
| <i>Coriobacteriaceae</i>  | 0.1  | 0.1  |
| <i>Lachnospiraceae</i>    | 0.08 | 0.1  |
| <i>Leuconostocaceae</i>   | 0.1  | 0.1  |
| <i>Bifidobacterium</i>    | 1.0  | 0.1  |
| <i>Enterobacteriaceae</i> | 0.08 | 0.1  |
| <i>Streptococcus</i>      | 0.1  | 0.1  |
| <i>Sediminibacterium</i>  | 0.4  | 0.1  |
| <i>Alkaliphilus</i>       | 0.64 | 0.2  |
| <i>Other</i>              | 0.08 | 0.2  |
| WPS-2                     | 1.0  | 0.35 |
| <i>Prevotella</i>         | 0.06 | 0.35 |
| <i>Micrococcaceae</i>     | 0.64 | 0.35 |
| <i>Leucobacter</i>        | 0.35 | 0.35 |
| <i>Microbacterium</i>     | 0.07 | 0.35 |
| <i>Microbacteriaceae</i>  | 0.18 | 0.35 |
| <i>Collinsella</i>        | 0.4  | 0.4  |
| <i>Delftia</i>            | 0.7  | 0.4  |
| <i>Solibacterales</i>     | 0.4  | 0.4  |
| <i>Ralstonia</i>          | 0.7  | 0.4  |
| <i>Veillonella</i>        | 0.64 | 0.5  |
| <i>Rothia</i>             | 1.0  | 0.5  |
| <i>Propionibacterium</i>  | 1.0  | 0.5  |
| <i>Actinomycetales</i>    | 0.5  | 0.5  |
| <i>Chryseobacterium</i>   | 0.5  | 0.5  |
| <i>Pirellulaceae</i>      | 0.5  | 0.5  |
| <i>Kurthia</i>            | 0.1  | 0.51 |
| <i>Rhizobiales</i>        | 1.0  | 0.51 |
| <i>Tepidimicrobium</i>    | 0.7  | 0.64 |
| Ellin329                  | 0.35 | 0.66 |

|                                |      |      |
|--------------------------------|------|------|
| <i>Clostridiaceae</i>          | 0.08 | 0.7  |
| <i>Bacillales</i>              | 0.7  | 0.7  |
| <i>Geobacillus</i>             | 0.7  | 0.7  |
| <i>Faecalibacterium</i>        | 0.18 | 0.7  |
| <i>Caulobacteraceae</i>        | 0.7  | 0.7  |
| <i>Pseudomonas</i>             | 1.0  | 1.0  |
| <i>Bacillaceae</i>             | 0.7  | 1.0  |
| <i>Kocuria</i>                 | 0.35 | 1.0  |
| <i>Oxalobacteraceae</i>        | 0.49 | 1.0  |
| <i>Acidaminococcus</i>         | 0.5  | 1.0  |
| <i>Bradyrhizobiaceae</i>       | 0.5  | 1.0  |
| <i>Phyllobacteriaceae</i>      | 0.5  | 1.0  |
| <i>Bilophila</i>               | 0.5  | 1.0  |
| <i>Thermogemmatissporaceae</i> | 0.82 | 1.0  |
| <i>Aneurinibacillus</i>        | 0.7  | 1.0  |
| <i>Actinomyces</i>             | 1.0  | 1.0  |
| <i>Brevibacterium</i>          | 1.0  | 1.0  |
| <i>Cloacibacterium</i>         | 1.0  | 1.0  |
| <i>Jeotgalicoccus</i>          | 1.0  | 1.0  |
| <i>Gemmataceae</i>             | 1.0  | 1.0  |
| <i>Mycetocola</i>              | 0.06 | 0.06 |
| <i>Rs-045</i>                  | 0.06 | 0.06 |
| <i>Streptomyces</i>            | 0.06 | 0.2  |
| <i>Facklamia</i>               | 0.5  | 0.2  |
| <i>Rathayibacter</i>           | 0.06 | 0.2  |
| <i>Saccharopolyspora</i>       | 0.06 | 0.2  |
| <i>Frigoribacterium</i>        | 0.06 | 0.2  |
| <i>Sanguibacter</i>            | 0.2  | 0.5  |
| <i>Agrococcus</i>              | NA   | 0.5  |
| <i>JG30-KF-CM45</i>            | NA   | 0.5  |
| <i>Paenibacillaceae</i>        | NA   | 0.5  |
| <i>Erysipelothrix</i>          | NA   | 0.5  |

---

|                          |      |     |
|--------------------------|------|-----|
| <i>Isosphaeraceae</i>    | NA   | 0.5 |
| <i>Macrococcus</i>       | 0.2  | 0.5 |
| <i>Williamsia</i>        | 0.5  | 0.5 |
| <i>Photobacterium</i>    | 0.5  | 0.5 |
| <i>Weissella</i>         | 0.19 | NA  |
| <i>Cellulomonas</i>      | 0.5  | NA  |
| <i>Proteiniclasticum</i> | 0.5  | NA  |
| <i>Peptococcus</i>       | 0.5  | NA  |

---
